# Supplementary material for: The Associations between COMT and MAO-B Genetic Variants with Negative Symptoms in Patients with Schizophrenia
Source: MDPI journal article supplement (doi:10.3390/cimb43020045), 2021-07-08
Supplement: s1 [file s1]

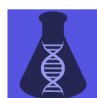

Article

# The Associations between COMT and MAO-B Genetic Variants with Negative Symptoms in Patients with Schizophrenia

Zoran Madzarac <sup>1</sup>, Lucija Tudor <sup>2</sup>, Marina Sagud <sup>1,3</sup>, Gordana Nedic Erjavec <sup>2</sup>, Alma Mihaljevic Peles <sup>1,3</sup> and Nela Pivac <sup>2,\*</sup>

<sup>1</sup> Department of Psychiatry and Psychological Medicine, University Hospital Centre Zagreb, 10 000 Zagreb, Croatia; zoranmadzarac@gmail.com (Z.M.); marinasagud@mail.com (M.S.); apeles@mef.hr (A.M.P.)

<sup>2</sup> Ruder Boskovic Institute, 10 000 Zagreb, Croatia; lucija.tudor@irb.hr (L.T.); gnedic@irb.hr (G.N.E.)

<sup>3</sup> School of Medicine, University of Zagreb, 10 000 Zagreb, Croatia

\* Correspondence: npivac@irb.hr; Tel.: +385-915-371-810

**Supplementary Table S1.** The distribution of COMT rs4680 and rs4818 and MAO-B rs1799836 and rs6651806 genotypes and alleles, as well as their haplotypes, in male and female patients with schizophrenia.

|                               |    | Male Patients (N=178) | Female Patients (N=124) | Statistics                     |
|-------------------------------|----|-----------------------|-------------------------|--------------------------------|
| COMT<br>rs4680                | AA | 28.7%                 | 21.8%                   | $\chi^2=4.421$ ; df=2; p=0.110 |
|                               | AG | 50.0%                 | 46.8%                   |                                |
|                               | GG | 21.3%                 | 31.5%                   |                                |
|                               | A  | 53.7%                 | 45.2%                   | $\chi^2=4.215$ ; df=1; p=0.040 |
|                               | G  | 46.3%                 | 54.8%                   |                                |
| COMT<br>rs4818                | CC | 38.8%                 | 33.1%                   | $\chi^2=4.857$ ; df=2; p=0.088 |
|                               | CG | 48.9%                 | 45.2%                   |                                |
|                               | GG | 12.4%                 | 21.8%                   |                                |
|                               | C  | 63.2%                 | 55.6%                   | $\chi^2=3.481$ ; df=2; p=0.062 |
|                               | G  | 36.8%                 | 44.4%                   |                                |
| COMT<br>rs4818-rs4680         | CA | 53.4%                 | 45.2%                   | $\chi^2=4.289$ ; df=2; p=0.117 |
|                               | GG | 36.5%                 | 44.4%                   |                                |
|                               | CG | 9.8%                  | 10.5%                   |                                |
|                               | GA | 0.3%                  | 0.0%                    |                                |
| MAO-B<br>rs1799836            | AA | -                     | 26.7%                   | -                              |
|                               | AG | -                     | 50.8%                   |                                |
|                               | GG | -                     | 22.5%                   |                                |
|                               | A  | 51.2%                 | 52.1%                   | $\chi^2=0.030$ ; df=1; p=0.860 |
|                               | G  | 48.8%                 | 47.9%                   |                                |
| MAO-B<br>rs6651806            | AA | -                     | 49.2%                   | -                              |
|                               | AC | -                     | 39.2%                   |                                |
|                               | CC | -                     | 11.7%                   |                                |
|                               | A  | 71.7%                 | 68.8%                   | $\chi^2=3.481$ ; df=1; p=0.062 |
|                               | C  | 28.3%                 | 31.3%                   |                                |
| MAO-B<br>rs1799836- rs6651806 | AA | 50.6%                 | 51.6%                   | $\chi^2=1.947$ ; df=2; p=0.378 |
|                               | GC | 27.2%                 | 31.9%                   |                                |
|                               | GA | 21.1%                 | 16.5%                   |                                |
|                               | AC | 1.1%                  | 0.0%                    |                                |

COMT – catechol-O-methyl transferase; MAO-B – monoamine oxidase B.

**Supplementary Table S2.** Severity of negative symptoms evaluated with CAINS subscales for socialization, vocational, recreation and expression depending on the COMT rs4680 and COMT rs4818 polymorphisms and their haplotype, in male and female patients with schizophrenia. The data are denoted as median and interquartile range, while p values in bold represent statistical significance.

| CAINS Socialization     |                               | CAINS Vocational              | CAINS Recreation         | CAINS Expression       |          |
|-------------------------|-------------------------------|-------------------------------|--------------------------|------------------------|----------|
| Male patients (N=178)   |                               |                               |                          |                        |          |
| COMT rs4680             | AA                            | 6 (4;9)                       | 4 (7;3)                  | 2 (4;7)                | 7 (5;9)  |
|                         | AG                            | 6 (4;8)                       | 3 (7;3)                  | 2 (4;7)                | 7 (5;9)  |
|                         | GG                            | 6 (5;8)                       | 3 (7;3)                  | 2 (4;7)                | 7 (5;9)  |
| Statistics              | H=0.230; df=2; p=0.891        | H=2.401; df=2; p=0.301        | H=0.063; df=2; p=0.969   | H=0.248; df=2; p=0.884 |          |
| COMT rs4680             | A                             | 6 (4;8)                       | 6 (4;7)                  | 3 (2;4)                | 7 (5;9)  |
|                         | G                             | 6 (4;8)                       | 5 (3;7)                  | 3 (2;4)                | 7 (5;9)  |
| Statistics              | U=15658.5; p=0.918            | U=14911.5; p=0.378            | U=15571.5; p=0.844       | U=15666.5; p=0.925     |          |
| COMT rs4818             | CC                            | 6 (4;8)                       | 6 (4;7)                  | 3 (2;4)                | 7 (5;9)  |
|                         | CG                            | 6 (4;8)                       | 5 (3;7)                  | 3 (2;4)                | 6 (5;8)  |
|                         | GG                            | 7 (5;8)                       | 5 (3;7)                  | 3 (2;4)                | 8 (5;9)  |
| Statistics              | H=0.379; df=2; p=0.827        | H=1.006; df=2; p=0.605        | H=0.041; df=2; p=0.980   | H=1.598; df=2; p=0.450 |          |
| COMT rs4818             | C                             | 6 (4;8)                       | 6 (4;7)                  | 3 (2;4)                | 7 (5;9)  |
|                         | G                             | 6 (4;8)                       | 5 (3;7)                  | 3 (2;4)                | 7 (5;9)  |
| Statistics              | U=14677.5; p=0.949            | U=14004.5; p=0.429            | U=14635.5; p=0.911       | U=14634.4; p=0.912     |          |
| COMT rs4818-rs4680      | CA                            | 6 (4;8)                       | 6 (4;7)                  | 3 (2;4)                | 7 (5;9)  |
|                         | GG                            | 6 (4;8)                       | 5 (3;7)                  | 3 (2;4)                | 7 (5;9)  |
|                         | CG                            | 6 (5;8)                       | 6 (3;7)                  | 3 (2;4)                | 6 (4;9)  |
| Statistics              | H=0.054; df=2; p=0.973        | H=0.824; df=2; p=0.662        | H=0.048; df=2; p=0.976   | H=0.024; df=2; p=0.988 |          |
| Female patients (N=124) |                               |                               |                          |                        |          |
| COMT rs4680             | AA                            | 5 (2;6)                       | 4 (3;7)                  | 2 (1;3)                | 6 (4;8)  |
|                         | AG                            | 5 (2;7)                       | 5 (3;7)                  | 3 (2;4)                | 6 (4;9)  |
|                         | GG                            | 6 (4;8)                       | 6 (4;8)                  | 3 (2;4)                | 6 (4;10) |
| Statistics              | H=6.719; df=2; <b>p=0.035</b> | H=3.830; df=2; p=0.147        | H=4.901; df=2; p=0.086   | H=0.323; df=2; p=0.851 |          |
| COMT rs4680             | A                             | 5 (3;6)                       | 5 (3;7)                  | 2 (2;4)                | 6 (4;8)  |
|                         | G                             | 6 (4;7)                       | 6 (4;8)                  | 3 (2;4)                | 6 (4;9)  |
| Statistics              | U=6144.0; <b>p=0.008</b>      | U=6499.0; <b>p=0.044</b>      | U=6384.0; <b>p=0.025</b> | U=7342; p=0.624        |          |
| COMT rs4818             | CC                            | 5 (3;6)                       | 4 (3;6)                  | 2 (1;3)                | 6 (4;8)  |
|                         | CG                            | 5 (4;7)                       | 6 (4;8)                  | 3 (2;4)                | 6 (4;9)  |
|                         | GG                            | 7 (5;8)                       | 6 (4;8)                  | 4 (2;4)                | 6 (4;8)  |
| Statistics              | H=8.813; df=2; <b>p=0.012</b> | H=7.835; df=2; <b>p=0.020</b> | H=4.817; df=2; p=0.090   | H=0.433; df=2; p=0.805 |          |
| COMT rs4818             | C                             | 5 (3;6)                       | 5 (3;7)                  | 2 (2;4)                | 6 (4;8)  |
|                         | G                             | 6 (4;8)                       | 6 (4;8)                  | 3 (2;4)                | 6 (4;9)  |
| Statistics              | U=5931.0; <b>p=0.003</b>      | U=6076.0; <b>p=0.006</b>      | U=6349.0; <b>p=0.024</b> | U=7274.0; p=0.571      |          |
| COMT rs4818-rs4680      | CA                            | 5 (3;6)                       | 5 (3;7)                  | 2 (2;4)                | 6 (4;8)  |
|                         | GG                            | 6 (4;8)                       | 6 (4;8)                  | 3 (2;4)                | 6 (4;9)  |
|                         | CG                            | 5 (4;6)                       | 5 (2;6)                  | 3 (2;4)                | 6 (4;10) |
| Statistics              | H=9.026; df=2; <b>p=0.011</b> | H=7.564; df=2; <b>p=0.023</b> | H=5.585; df=2; p=0.061   | H=0.324; df=2; p=0.850 |          |

CAINS—Clinical Assessment Interview for Negative Symptoms; COMT—catechol-O-methyl transferase.

**Supplementary Table S3.** Severity of negative symptoms evaluated with BNSS subscales for anhedonia, asocialization, avolition, blunted effect and alogia, depending on the COMT rs4680 and COMT rs4818 polymorphisms and their haplotype, in male and female patients with schizophrenia. The data are denoted as median and interquartile range, while p values in bold represent statistical significance.

|                                |    | BNSS Anhedonia                | BNSS Asocialization    | BNSS Avolition         | BNSS Blunted Effect    | BNSS Alogia            |
|--------------------------------|----|-------------------------------|------------------------|------------------------|------------------------|------------------------|
| <b>Male patients (N=178)</b>   |    |                               |                        |                        |                        |                        |
| COMT rs4680                    | AA | 6 (5;8)                       | 4 (3;5)                | 6 (4;8)                | 8 (6;11)               | 2 (1;4)                |
|                                | AG | 6 (4;9)                       | 4 (2;5)                | 5 (3;7)                | 8 (6;11)               | 3 (0;4)                |
|                                | GG | 6 (4;9)                       | 4 (3;5)                | 6 (3;8)                | 8 (6;11)               | 2 (1;4)                |
| Statistics                     |    | H=0.460; df=2; p=0.794        | H=0.156; df=2; p=0.925 | H=2.223; df=2; p=0.329 | H=0.578; df=2; p=0.749 | H=0.907; df=2; p=0.635 |
| COMT rs4680                    | A  | 6 (4;9)                       | 4 (3;5)                | 6 (4;8)                | 8 (6;11)               | 2 (1;4)                |
|                                | G  | 6 (4;9)                       | 4 (3;5)                | 5 (3;7)                | 8 (6;11)               | 2 (1;4)                |
| Statistics                     |    | U=15640.5; p=0.903            | U=15620.5; p=0.884     | U=14588.5; p=0.224     | U=15744.5; p=0.989     | U=15502.5; p=0.789     |
| COMT rs4818                    | CC | 6 (5;8)                       | 4 (3;5)                | 6 (4;8)                | 8 (5;11)               | 2 (1;4)                |
|                                | CG | 6 (4;10)                      | 4 (2;5)                | 5 (2;7)                | 8 (6;11)               | 2 (1;4)                |
|                                | GG | 6 (4;9)                       | 4 (3;4)                | 6 (3;7)                | 8 (6;11)               | 2 (1;4)                |
| Statistics                     |    | H=0.332; df=2; p=0.847        | H=0.244; df=2; p=0.885 | H=1.093; df=2; p=0.386 | H=0.251; df=2; p=0.882 | H=0.706; df=2; p=0.703 |
| COMT rs4818                    | C  | 6 (4;9)                       | 4 (2;5)                | 6 (4;8)                | 8 (6;11)               | 2 (1;4)                |
|                                | G  | 6 (4;10)                      | 4 (3;5)                | 5 (3;7)                | 8 (6;11)               | 2 (1;4)                |
| Statistics                     |    | U=14583.5; p=0.869            | U=14578.5; p=0.861     | U=13614.5; p=0.227     | U=14683.5; p=0.954     | U=14727.5; p=0.991     |
| COMT rs4818-rs4680             | CA | 6 (4;9)                       | 4 (3;5)                | 6 (4;8)                | 8 (6;11)               | 2 (1;4)                |
|                                | GG | 6 (4;9)                       | 4 (3;5)                | 5 (3;7)                | 8 (6;11)               | 2 (1;4)                |
|                                | CG | 6 (4;9)                       | 4 (2;5)                | 6 (3;8)                | 8 (6;12)               | 3 (0;4)                |
| Statistics                     |    | H=0.072; df=2; p=0.965        | H=0.162; df=2; p=0.922 | H=1.696; df=2; p=0.428 | H=0.053; df=2; p=0.974 | H=0.187; df=2; p=0.911 |
| <b>Female patients (N=124)</b> |    |                               |                        |                        |                        |                        |
| COMT rs4680                    | AA | 5 (3;7)                       | 3 (2;4)                | 4 (4;7)                | 8 (6;10)               | 2 (0;4)                |
|                                | AG | 5 (3;9)                       | 3 (2;4)                | 5 (3;6)                | 8 (5;11)               | 2 (0;4)                |
|                                | GG | 8 (5;10)                      | 4 (2;5)                | 6 (4;8)                | 8 (6;12)               | 2 (0;5)                |
| Statistics                     |    | H=5.286; df=2; p=0.071        | H=4.295; df=2; p=0.117 | H=2.688; df=2; p=0.261 | H=0.295; df=2; p=0.863 | H=1.146; df=2; p=0.564 |
| COMT rs4680                    | A  | 5 (3;8)                       | 3 (2;4)                | 4 (3;7)                | 8 (6;11)               | 2 (0;4)                |
|                                | G  | 7 (4;9)                       | 4 (2;4)                | 6 (3;7)                | 8 (6;12)               | 2 (0;4)                |
| Statistics                     |    | U=6336.0; <b>p=0.022</b>      | U=6676.0; p=0.081      | U=6874.0; p=0.183      | U=7303.0; p=0.576      | U=7075.0; p=0.323      |
| COMT rs4818                    | CC | 5 (3;7)                       | 3 (2;4)                | 4 (2;6)                | 8 (6;10)               | 2 (0;3)                |
|                                | CG | 7 (4;9)                       | 3 (2;4)                | 5 (3;8)                | 8 (6;12)               | 2 (0;4)                |
|                                | GG | 8 (4;10)                      | 4 (2;5)                | 6 (3;8)                | 8 (6;12)               | 2 (0;4)                |
| Statistics                     |    | H=6.653; df=2; <b>p=0.034</b> | H=3.406; df=2; p=0.182 | H=2.656; df=2; p=0.265 | H=1.230; df=2; p=0.541 | H=0.115; df=2; p=0.944 |

|                    |    |                                |                        |                        |                        |                        |
|--------------------|----|--------------------------------|------------------------|------------------------|------------------------|------------------------|
| COMT rs4818        | C  | 5 (3;8)                        | 3 (2;4)                | 5 (3;7)                | 8 (6;11)               | 2 (0;4)                |
|                    | G  | 7 (4;10)                       | 4 (2;4)                | 6 (3;8)                | 8 (6;12)               | 2 (0;4)                |
| Statistics         |    | U=6119.0; <b>p=0.008</b>       | U=6700.0; p=0.098      | U=6752.0; p=0.132      | U=7149.0; p=0.430      | U=7515.0; p=0.891      |
| COMT rs4818-rs4680 | CA | 5 (3;8)                        | 3 (2;4)                | 4 (3;7)                | 8 (6;11)               | 2 (0;4)                |
|                    | GG | 7 (4;10)                       | 4 (2;4)                | 6 (3;8)                | 8 (6;12)               | 2 (0;4)                |
|                    | CG | 6 (3;9)                        | 4 (2;6)                | 6 (2;7)                | 8 (4;11)               | 2 (2;5)                |
| Statistics         |    | H=7.0421; df=2; <b>p=0.030</b> | H=3.206; df=2; p=0.201 | H=2.305; df=2; p=0.316 | H=0.641; df=2; p=0.726 | H=2.260; df=2; p=0.323 |

BNSS—The Brief Negative Symptom Scale; COMT—catechol-O-methyl transferase.

**Supplementary Table S4.** The distribution of COMT rs4680 and COMT rs4818 genotypes, alleles and haplotypes depending on the presence of physical and social anhedonia in male and female patients with schizophrenia. P values in bold represent statistical significance.

| Physical Anhedonia      |    |                                | Social Anhedonia |                                |            |
|-------------------------|----|--------------------------------|------------------|--------------------------------|------------|
| Male patients (N=178)   |    |                                |                  |                                |            |
|                         |    | No (N=141)                     | Yes (N=37)       | No (151)                       | Yes (N=27) |
| COMT rs4680             | AA | 28.4%                          | 29.7%            | 29.1%                          | 25.9%      |
|                         | AG | 49.6%                          | 51.4%            | 49.7%                          | 51.9%      |
|                         | GG | 22.0%                          | 18.9%            | 21.2%                          | 22.2%      |
| Statistics              |    | $\chi^2=0.165$ ; df=2; p=0.912 |                  | $\chi^2=1.116$ ; df=2; p=0.944 |            |
| COMT rs4680             | A  | 53.2%                          | 55.4%            | 54.0%                          | 51.9%      |
|                         | G  | 46.8%                          | 44.6%            | 46.0%                          | 48.1%      |
| Statistics              |    | $\chi^2=0.116$ ; df=1; p=0.734 |                  | $\chi^2=0.083$ ; df=1; p=0.773 |            |
| COMT rs4818             | CC | 39.0%                          | 37.8%            | 38.4%                          | 40.7%      |
|                         | CG | 48.2%                          | 51.4%            | 49.0%                          | 48.1%      |
|                         | GG | 12.8%                          | 10.8%            | 12.6%                          | 11.1%      |
| Statistics              |    | $\chi^2=0.160$ ; df=2; p=0.923 |                  | $\chi^2=0.076$ ; df=2; p=0.963 |            |
| COMT rs4818             | C  | 63.1%                          | 63.5%            | 62.9%                          | 64.8%      |
|                         | G  | 36.9%                          | 36.5%            | 37.1%                          | 35.2%      |
| Statistics              |    | $\chi^2=0.004$ ; df=1; p=0.950 |                  | $\chi^2=0.071$ ; df=1; p=0.790 |            |
| COMT rs4818-rs4680      | CA | 53.0%                          | 55.4%            | 53.8%                          | 51.9%      |
|                         | GG | 36.7%                          | 36.5%            | 36.9%                          | 35.2%      |
|                         | GC | 10.3%                          | 8.1%             | 9.3%                           | 13.0%      |
| Statistics              |    | $\chi^2=0.353$ ; df=2; p=0.838 |                  | $\chi^2=0.691$ ; df=2; p=0.708 |            |
| Female patients (N=124) |    |                                |                  |                                |            |
|                         |    | No (N=78)                      | Yes (N=46)       | No (N=88)                      | Yes (N=36) |
| COMT rs4680             | AA | 21.8%                          | 21.7%            | 25.0%                          | 13.9%      |
|                         | AG | 46.2%                          | 47.8%            | 46.6%                          | 47.2%      |
|                         | GG | 32.1%                          | 30.4%            | 28.4%                          | 38.9%      |
| Statistics              |    | $\chi^2=0.041$ ; df=2; p=0.980 |                  | $\chi^2=2.343$ ; df=2; p=0.310 |            |
| COMT rs4680             | A  | 44.9%                          | 45.7%            | 48.3%                          | 37.5%      |
|                         | G  | 55.1%                          | 54.3%            | 51.7%                          | 62.5%      |
| Statistics              |    | $\chi^2=0.014$ ; df=1; p=0.905 |                  | $\chi^2=2.404$ ; df=1; p=0.121 |            |
| COMT rs4818             | CC | 33.3%                          | 32.6%            | 38.6%                          | 19.4%      |
|                         | CG | 43.6%                          | 47.8%            | 42.0%                          | 52.8%      |
|                         | GG | 23.1%                          | 19.6%            | 19.3%                          | 27.8%      |
| Statistics              |    | $\chi^2=0.283$ ; df=2; p=0.868 |                  | $\chi^2=4.337$ ; df=2; p=0.114 |            |
| COMT rs4818             | C  | 55.1%                          | 56.5%            | 59.7%                          | 45.8%      |

|                       |    |                                |       |                                       |       |
|-----------------------|----|--------------------------------|-------|---------------------------------------|-------|
|                       | G  | 44.9%                          | 43.5% | 40.3%                                 | 54.2% |
| Statistics            |    | $\chi^2=0.046$ ; df=1; p=0.831 |       | $\chi^2=3.957$ ; df=1; <b>p=0.047</b> |       |
| COMT<br>rs4818-rs4680 | CA | 44.9%                          | 45.7% | 48.3%                                 | 37.5% |
|                       | GG | 44.9%                          | 43.5% | 40.3%                                 | 54.2% |
|                       | GC | 10.3%                          | 10.9% | 11.4%                                 | 8.3%  |
| Statistics            |    | $\chi^2=0.054$ ; df=2; p=0.973 |       | $\chi^2=3.968$ ; df=2; p=0.138        |       |

COMT—catechol-O-methyl transferase.

**Supplementary Table S5.** Severity of negative symptoms evaluated with CAINS subscales for socialization, vocational, recreation and expression depending on the MAO-B rs1799836 and MAO-B rs6651806 polymorphisms, and their haplotype, in male and female patients with schizophrenia. The data are denoted as median and interquartile range, while p values in bold represent statistical significance.

|                                  |    | CAINS Socialization    | CAINS Vocational       | CAINS Recreation         | CAINS Expression              |
|----------------------------------|----|------------------------|------------------------|--------------------------|-------------------------------|
| <b>Male patients (N=178)</b>     |    |                        |                        |                          |                               |
| MAO-B rs1799836                  | A  | 6 (4;8)                | 5 (4;7)                | 3 (2;4)                  | 7 (5;9)                       |
|                                  | G  | 6 (4;8)                | 6 (3;7)                | 3 (2;4)                  | 6 (4;8)                       |
| Statistics                       |    | U=3223.5; p=0.477      | U=3416.0; p=0.931      | U=3159.0; p=0.348        | U=2866.5; p=0.061             |
| MAO-B rs6651806                  | A  | 6 (4;8)                | 5 (4;7)                | 3 (2;4)                  | 7 (5;9)                       |
|                                  | C  | 6 (3;9)                | 4 (3;7)                | 2 (2;4)                  | 5 (4;8)                       |
| Statistics                       |    | U=2721.0; p=0.785      | U=2411.5; p=0.163      | U=2223.0; <b>p=0.035</b> | U=2132.0; <b>p=0.017</b>      |
| MAO-B<br>rs1799836-<br>rs6651806 | AA | 6 (4;8)                | 5 (4;7)                | 3 (2;4)                  | 7 (5;9)                       |
|                                  | GC | 6 (3;8)                | 6 (3;7)                | 2 (1;4)                  | 5 (4;8)                       |
|                                  | GA | 6 (4;8)                | 6 (4;7)                | 3 (2;4)                  | 7 (5;8)                       |
| Statistics                       |    | H=1.506; df=2; p=0.471 | H=1.143; df=2; p=0.565 | H=5.226; df=2; p=0.073   | H=6.308; df=2; <b>p=0.043</b> |
| <b>Female patients (N=124)</b>   |    |                        |                        |                          |                               |
| MAO-B rs1799836                  | AA | 6 (4;8)                | 6 (4;7)                | 3 (2;4)                  | 6 (4;8)                       |
|                                  | AG | 5 (4;7)                | 6 (4;7)                | 3 (2;4)                  | 7 (5;9)                       |
|                                  | GG | 5 (3;6)                | 4 (3;8)                | 3 (1;4)                  | 6 (4;8)                       |
| Statistics                       |    | H=2.287; df=2; p=0.319 | H=1.194; df=2; p=0.551 | H=0.960; df=2; p=0.619   | H=1.688; df=2; p=0.430        |
| MAO-B rs1799836                  | A  | 6 (4;7)                | 6 (4;7)                | 3 (2;4)                  | 6 (4;9)                       |
|                                  | G  | 5 (4;6)                | 5 (3;7)                | 3 (2;4)                  | 6 (4;9)                       |
| Statistics                       |    | U=6404.5; p=0.142      | U=7080.5; p=0.840      | U=6724.5; p=0.379        | U=7102.5; p=0.874             |
| MAO-B rs6651806                  | AA | 6 (3;7)                | 6 (3;7)                | 3 (2;4)                  | 6 (4;8)                       |
|                                  | AC | 5 (4;7)                | 6 (4;7)                | 3 (2;4)                  | 6 (4;10)                      |
|                                  | CC | 6 (3;6)                | 4 (3;6)                | 2 (1;4)                  | 7 (4;9)                       |
| Statistics                       |    | H=0.333; df=2; p=0.847 | H=1.522; df=2; p=0.467 | H=2.501; df=2; p=0.286   | H=0.555; df=2; p=0.758        |
| MAO-B rs6651806                  | A  | 5 (4;7)                | 6 (4;7)                | 3 (2;4)                  | 6 (4;8)                       |
|                                  | C  | 5 (4;7)                | 5 (3;7)                | 3 (2;4)                  | 7 (4;9)                       |
| Statistics                       |    | U=6037.5; p=0.762      | U=5872.5; p=0.523      | U=6129.5; p=0.905        | U=5802.5; p=0.437             |
| MAO-B<br>rs1799836-<br>rs6651806 | AA | 6 (4;7)                | 6 (4;7)                | 3 (2;4)                  | 6 (4;9)                       |
|                                  | GC | 5 (4;7)                | 5 (3;7)                | 3 (2;4)                  | 6 (4;9)                       |
|                                  | GA | 5 (3;6)                | 6 (3;8)                | 2 (1;4)                  | 6 (4;8)                       |
| Statistics                       |    | H=1.846; df=2; p=0.397 | H=0.438; df=2; p=0.803 | H=1.742; df=2; p=0.419   | H=0.704; df=2; p=0.703        |

CAINS—Clinical Assessment Interview for Negative Symptoms; MAO-B—monoamine oxidase B.

**Supplementary Table S6.** Severity of negative symptoms evaluated with BNSS subscales for anhedonia, asocialization, avolition, blunted effect and alogia, depending on the MAO-B rs1799836 and MAO-B rs6651806 polymorphisms, and their haplotype, in male and female patients with schizophrenia. The data are denoted as median and interquartile range, while p values in bold represent statistical significance.

|                                |    | BNSS Anhedonia           | BNSS Asocialization    | BNSS Avolition          | BNSS Blunted Effect    | BNSS Alogia                   |
|--------------------------------|----|--------------------------|------------------------|-------------------------|------------------------|-------------------------------|
| <b>Male patients (N=178)</b>   |    |                          |                        |                         |                        |                               |
| MAO-B                          | A  | 6 (5;9)                  | 4 (3;5)                | 6 (4;8)                 | 8 (7;11)               | 2 (2;4)                       |
| rs1799836                      | G  | 6 (3;9)                  | 4 (2;5)                | 6 (4;7)                 | 7 (5;11)               | 2 (0;4)                       |
| Statistics                     |    | U=3140.0; p=0.511        | U=3243.0; p=0.505      | U=3382.0; p=0.844       | U=3062.5; p=0.218      | U=2765.0; <b>p=0.026</b>      |
| MAO-B                          | A  | 6 (5;9)                  | 4 (3;5)                | 6 (4;7)                 | 8 (6;11)               | 2 (2;4)                       |
| rs6651806                      | C  | 5 (3;9)                  | 4 (2;5)                | 5 (2;8)                 | 7 (5;11)               | 1 (0;4)                       |
| Statistics                     |    | U=2208.5; <b>p=0.034</b> | U=2413.0; p=0.155      | U=2587.0; p=0.449       | U=2360.5; p=0.117      | U=1949.5; <b>p=0.002</b>      |
| MAO-B                          | AA | 6 (5;9)                  | 4 (3;5)                | 6 (4;8)                 | 8 (7;11)               | 2 (2;4)                       |
| rs1799836- GC                  |    | 5 (3;8)                  | 4 (2;4)                | 5 (3;8)                 | 7 (5;10)               | 1 (0;3)                       |
| rs6651806 GA                   |    | 7 (5;9)                  | 4 (3;5)                | 6 (4;7)                 | 9 (6;11)               | 2 (1;5)                       |
| Statistics                     |    | H=4.963; df=2; p=0.084   | H=2.358; df=2; p=0.308 | H=0.627; df=2; p=0.731  | H=3.861; df=2; p=0.145 | H=9.047; df=2; <b>p=0.011</b> |
| <b>Female patients (N=124)</b> |    |                          |                        |                         |                        |                               |
| MAO-B                          | AA | 7 (5;9)                  | 4 (2;4)                | 6 (3;7)                 | 9 (6;10)               | 2 (0;4)                       |
| rs1799836                      | AG | 6 (4;9)                  | 4 (2;4)                | 6 (4;7)                 | 8 (6;12)               | 2 (1;4)                       |
|                                | GG | 5 (3;9)                  | 3 (2;4)                | 4 (2;6)                 | 8 (5;11)               | 2 (0;3)                       |
| Statistics                     |    | H=0.779; df=2; p=0.677   | H=1.744; df=2; p=0.418 | H=2.951; df=2; p=0.229  | H=0.325; df=2; p=0.850 | H=3.266; df=2; p=0.195        |
| MAO-B                          | A  | 7 (4;9)                  | 4 (2;4)                | 6 (4;7)                 | 8 (6;11)               | 2 (0;4)                       |
| rs1799836                      | G  | 5 (3;9)                  | 3 (2;4)                | 5 (3;7)                 | 8 (6;11)               | 2 (0;4)                       |
| Statistics                     |    | U=6744.5; p=0.406        | U=6648.5; p=0.297      | U=6693.5; p=0.354       | U=7231.5; p=0.917      | U=7180.5; p=0.989             |
| MAO-B                          | AA | 6 (3;8)                  | 4 (2;4)                | 5 (4;8)                 | 8 (6;10)               | 2 (0;4)                       |
| rs6651806                      | AC | 7 (4;10)                 | 4 (2;4)                | 5 (4;7)                 | 8 (5;12)               | 2 (0;4)                       |
|                                | CC | 5 (3;9)                  | 2 (2;4)                | 4 (2;6)                 | 9 (9;11)               | 2 (1;4)                       |
| Statistics                     |    | H=3.331; df=2; p=0.189   | H=1.414; df=2; p=0.493 | H=2.754; df=2; p=0.252  | H=1.314; df=2; p=0.519 | H=0.068; df=2; p=0.967        |
| MAO-B                          | A  | 6 (4;8)                  | 4 (2;4)                | 5 (4;7)                 | 8 (6;11)               | 2 (0;4)                       |
| rs6651806                      | C  | 6 (3;9)                  | 3 (2;4)                | 5 (3;7)                 | 8 (6;12)               | 2 (0;4)                       |
| Statistics                     |    | U=5937.5; p=0.613        | U=5665.5; p=0.276      | U=5745.5; p=0.371       | U=5612.5; p=0.247      | U=6062.5; p=0.797             |
| MAO-B                          | AA | 7 (4;9)                  | 4 (2;4)                | 6 (3;7)                 | 8 (6;11)               | 2 (0;4)                       |
| rs1799836- GC                  |    | 7 (3;10)                 | 4 (2;4)                | 5 (3;7)                 | 8 (6;12)               | 2 (0;4)                       |
| rs6651806 GA                   |    | 5 (3;7)                  | 3 (2;4)                | 5 (4;7)                 | 8 (6;10)               | 2 (0;4)                       |
| Statistics                     |    | H=2.725; df=2; p=0.256   | H=0.595; df=2; p=0.743 | H=0.6337; df=2; p=0.727 | H=2.918; df=2; p=0.232 | H=0.210; df=2; p=0.900        |

BNSS—The Brief Negative Symptom Scale; MAO-B—monoamine oxidase B.

**Supplementary Table S7.** The distribution of MAO-B rs1799836 and MAO-B rs6651806 genotypes, alleles and haplotypes depending on the presence of physical and social anhedonia in male and female patients with schizophrenia. P values in bold represent statistical significance.

|                                |    | Physical Anhedonia                    |            | Social Anhedonia                      |            |
|--------------------------------|----|---------------------------------------|------------|---------------------------------------|------------|
| Male Patients (N=178)          |    | No (N=141)                            | Yes (N=37) | No (151)                              | Yes (N=27) |
| MAO-B rs1799836                | A  | 52.2%                                 | 46.9%      | 50.3%                                 | 56.5%      |
|                                | G  | 47.8%                                 | 53.1%      | 49.7%                                 | 43.5%      |
| Statistics                     |    | $\chi^2=0.297$ ; df=1; p=0.585        |            | $\chi^2=0.302$ ; df=1; p=0.583        |            |
| MAO-B rs6651806                | A  | 69.4%                                 | 81.3%      | 71.3%                                 | 73.9%      |
|                                | C  | 30.6%                                 | 18.8%      | 28.7%                                 | 26.1%      |
| Statistics                     |    | $\chi^2=1.786$ ; df=1; p=0.181        |            | $\chi^2=0.065$ ; df=1; p=0.798        |            |
| MAO-B rs1799836 -<br>rs6651806 | AA | 52.2%                                 | 48.6%      | 50.3%                                 | 57.7%      |
|                                | GC | 29.0%                                 | 21.6%      | 28.2%                                 | 23.1%      |
|                                | GA | 18.8%                                 | 29.7%      | 21.5%                                 | 19.2%      |
| Statistics                     |    | $\chi^2=2.284$ ; df=2; p=0.319        |            | $\chi^2=0.497$ ; df=2; p=0.780        |            |
| Female patients (N=124)        |    | No (N=78)                             | Yes (N=46) | No (N=88)                             | Yes (N=36) |
| MAO-B rs1799836                | AA | 22.7%                                 | 33.3%      | 23.8%                                 | 33.3%      |
|                                | GA | 50.7%                                 | 51.1%      | 50.0%                                 | 52.8%      |
|                                | GG | 26.7%                                 | 15.6%      | 26.2%                                 | 13.9%      |
| Statistics                     |    | $\chi^2=2.744$ ; df=2; p=0.254        |            | $\chi^2=2.590$ ; df=2; p=0.274        |            |
| MAO-B rs1799836                | A  | 48.0%                                 | 58.9%      | 48.8%                                 | 59.7%      |
|                                | G  | 52.0%                                 | 41.1%      | 51.2%                                 | 40.3%      |
| Statistics                     |    | $\chi^2=2.672$ ; df=1; p=0.102        |            | $\chi^2=2.405$ ; df=1; p=0.121        |            |
| MAO-B rs6651806                | AA | 44.0%                                 | 57.8%      | 42.9%                                 | 63.9%      |
|                                | AC | 40.0%                                 | 37.8%      | 44.0%                                 | 27.8%      |
|                                | CC | 16.0%                                 | 4.4%       | 13.1%                                 | 8.3%       |
| Statistics                     |    | $\chi^2=4.340$ ; df=2; p=0.114        |            | $\chi^2=4.460$ ; df=2; p=0.108        |            |
| MAO-B rs6651806                | A  | 64.0%                                 | 76.7%      | 64.9%                                 | 77.8%      |
|                                | C  | 36.0%                                 | 23.3%      | 35.1%                                 | 22.2%      |
| Statistics                     |    | $\chi^2=4.201$ ; df=2; <b>p=0.040</b> |            | $\chi^2=3.902$ ; df=1; <b>p=0.048</b> |            |
| MAO-B rs1799836 -<br>rs6651806 | AA | 48.1%                                 | 58.7%      | 48.9%                                 | 59.7%      |
|                                | GC | 36.4%                                 | 23.9%      | 35.6%                                 | 22.2%      |
|                                | GA | 15.6%                                 | 17.4%      | 15.5%                                 | 18.1%      |
| Statistics                     |    | $\chi^2=4.185$ ; df=2; p=0.123        |            | $\chi^2=4.247$ ; df=2; p=0.120        |            |

MAO-B—monoamine oxidase B.
